# Supplementary material
Source: publisher site journal article supplement (https://www.dovepress.com/article/488279)
Supplement: Supplementary file 1 [file get_supplementary_file.php]

Supplementary File 1: The Ohio State Wexner Medical Center Value Scorecard for Physician-led Sourcing Projects.

| Criteria                                                | Description                                                                            |
|---------------------------------------------------------|----------------------------------------------------------------------------------------|
| <b>Product Improves Patient Outcomes (Quantifiable)</b> | Results can be measured and are supported by data. Ex. LOS, SSI.                       |
| <b>Level of Clinical Evidence</b>                       | Level and type of evidence                                                             |
| <b>Physician or Clinical Preference</b>                 | Benefit that is not quantifiable. Familiarity, ease of use, relationships, flexibility |
| <b>Patient Safety</b>                                   | Prevents unintended or unnatural negative events                                       |
| <b>Staff Safety</b>                                     | Prevents unintended or unnatural negative events                                       |
| <b>Standardization</b>                                  | Reduces the number of Suppliers and/or SKU, standardizes clinical practice             |
| <b>Clinical Efficiency</b>                              | Saves clinical time                                                                    |
| <b>Operational Efficiency</b>                           | Saves operational time                                                                 |
| <b>Revenue</b>                                          | Revenue Impact                                                                         |
| <b>Cost (Savings)</b>                                   | Cost Impact                                                                            |
| <b>Strategy</b>                                         | Aligns with Health System strategic priorities                                         |
| <b>Breadth and Depth of Portfolio</b>                   | Meets needs with limited exceptions                                                    |
| <b>Inventory Impact</b>                                 | Adds or removes inventory                                                              |
| <b>Effort to Implement</b>                              | Ensures the effort is commensurate with impact/benefit                                 |
| <b>Delivery</b>                                         | Provides timely training, support and resources upon delivery                          |
| <b>Sustainability and Diversity</b>                     | Impact of product(s) to the environment or support of diverse businesses               |
| <b>Term(s)</b>                                          | Length of agreement, other business terms                                              |
| <b>Vizient Contract Admin Fees Impact</b>               | Spend contributes to admin fee target                                                  |
| <b>Supply Assurance</b>                                 | Reliable delivery of goods and services                                                |

**Notes:** The Ohio State Wexner Medical Center Value Scorecard used in the decision-making process of this initiative to evaluate the merits of the sourcing project across specific variables.

|                                           |                                         |
|-------------------------------------------|-----------------------------------------|
| <b>Company Management</b>                 | Stability within company                |
| <b>Financial Performance of Supplier</b>  | Stability within company                |
| <b>Other initiative-specific criteria</b> | Per the needs of the product or service |
